# Supplementary material for: CCND2, CTNNB1, DDX3X, GLI2, SMARCA4, MYC, MYCN, PTCH1, TP53, and MLL2 gene variants and risk of childhood medulloblastoma
Source: Springer Nature journal article supplement (doi:10.1007/s11060-015-1891-1), 2015-08-19
Supplement: MOESM1 [file 8951376]

## Supplemental Material for

# ***CCND2, CTNNB1, DDX3X, GLI2, SMARCA4, MYC, MYCN, PTCH1, TP53, and MLL2 gene variants and risk of childhood medulloblastoma***

Anna M Dahlin<sup>1</sup>, Mads V Hollegaard<sup>2</sup>, Carl Wibom<sup>1</sup>, Ulrika Andersson<sup>1</sup>, David M Hougaard<sup>2</sup>, Isabelle Deltour<sup>3,4</sup>, Ulf Hjalmar<sup>1</sup>, and Beatrice Melin<sup>1</sup>

<sup>1</sup> Department of Radiation Sciences, Oncology, Umeå University, 901 87 Umeå, Sweden

<sup>2</sup> Danish Centre for Neonatal Screening, Department of Congenital Disorders, Statens Serum Institut, DK-2300, Copenhagen, Denmark

<sup>3</sup> International Agency for Research on Cancer, Section of Environment and Radiation, 69372 Lyon, France

<sup>4</sup> Danish Cancer Society Research Center, Unit of Statistics, Bioinformatics and Registry, DK-2100 Copenhagen, Denmark

**Supplementary Table 1.** Genes included in the present study

| Chr | Gene start <sup>a</sup> | Gene end <sup>a</sup> | Gene                | Number of SNPs |                                                                                                                |
|-----|-------------------------|-----------------------|---------------------|----------------|----------------------------------------------------------------------------------------------------------------|
| 2   | 16080686                | 16087129              | <i>MYCN</i>         | 1              | Recurrently amplified in medulloblastoma tumors [1-3].                                                         |
| 2   | 121493199               | 121750229             | <i>GLI2</i>         | 94             | Recurrently amplified in medulloblastoma tumors, particularly in the SHH subgroup [2]. Mediates SHH signaling. |
| 3   | 41236328                | 41301587              | <i>CTNNB1</i>       | 20             | Recurrently mutated in medulloblastoma tumors, particularly in the WNT subgroup [3-6].                         |
| 8   | 128747680               | 128753674             | <i>MYC</i>          | 1              | Recurrently amplified in medulloblastoma tumors [1-4].                                                         |
| 9   | 98205262                | 98279339              | <i>PTCH1</i>        | 22             | Recurrently mutated in medulloblastoma tumors, particularly in the SHH subgroup [3-6].                         |
| 12  | 4382938                 | 4414516               | <i>CCND2</i>        | 27             | Recurrently amplified in medulloblastoma tumors [2]. Involved in cell cycle regulation.                        |
| 12  | 49412758                | 49453557              | <i>MLL2 (KMT2D)</i> | 9              | Recurrently mutated in medulloblastoma tumors [3-6].                                                           |
| 17  | 7565097                 | 7590856               | <i>TP53</i>         | 9              | Recurrently mutated in medulloblastoma tumors [3-6].                                                           |
| 19  | 11071598                | 11176071              | <i>SMARCA4</i>      | 28             | Recurrently mutated in medulloblastoma tumors, particularly in the WNT subgroup [3-6].                         |
| X   | 41192651                | 41223725              | <i>DDX3X</i>        | 10             | Recurrently mutated in medulloblastoma tumors, particularly in the WNT subgroup [3, 5, 6].                     |

<sup>a</sup> Ensemble gene annotations (GRCh37.p8) were obtained from MartView (<http://biomart.org>)

SHH, sonic hedgehog.

**Supplementary Table 2.** OR and p-values for risk of medulloblastoma for all investigated SNPs

| SNP<br>(minor/major(ref) allele) | chr | bp<br>(GRCh37/hg19) | OR <sub>comb</sub> <sup>a</sup> | P <sub>comb</sub> <sup>a</sup> | Gene        |
|----------------------------------|-----|---------------------|---------------------------------|--------------------------------|-------------|
| rs922 (A/G)                      | 2   | 16086469            | 1.20                            | 0.236                          | <i>MYCN</i> |
| rs67611826 (G/A)                 | 2   | 121500265           | 1.26                            | 0.084                          | <i>GLI2</i> |
| rs62150664 (A/G)                 | 2   | 121501287           | 0.94                            | 0.681                          | <i>GLI2</i> |
| rs13008945 (G/A)                 | 2   | 121506802           | 0.70                            | 0.033                          | <i>GLI2</i> |
| rs6757829 (G/A)                  | 2   | 121509295           | 0.75                            | 0.244                          | <i>GLI2</i> |
| rs776501 (A/G)                   | 2   | 121509378           | 0.80                            | 0.102                          | <i>GLI2</i> |
| rs776504 (A/C)                   | 2   | 121513197           | 1.28                            | 0.065                          | <i>GLI2</i> |
| rs11901641 (C/A)                 | 2   | 121513993           | 0.93                            | 0.631                          | <i>GLI2</i> |
| rs13034141 (C/A)                 | 2   | 121515390           | 0.72                            | 0.076                          | <i>GLI2</i> |
| rs707490 (A/G)                   | 2   | 121517174           | 1.27                            | 0.071                          | <i>GLI2</i> |
| rs4848627 (G/A)                  | 2   | 121530262           | 0.75                            | 0.078                          | <i>GLI2</i> |
| rs11677381 (A/G)                 | 2   | 121530351           | 1.54                            | 0.086                          | <i>GLI2</i> |
| rs2121992 (A/G)                  | 2   | 121532932           | 0.72                            | 0.046                          | <i>GLI2</i> |
| rs17389953 (C/A)                 | 2   | 121532983           | 0.92                            | 0.578                          | <i>GLI2</i> |
| rs4848628 (C/A)                  | 2   | 121536569           | 0.68                            | 0.039                          | <i>GLI2</i> |
| rs79503443 (A/G)                 | 2   | 121537891           | 0.66                            | 0.374                          | <i>GLI2</i> |
| rs2053989 (G/A)                  | 2   | 121544316           | 1.13                            | 0.380                          | <i>GLI2</i> |
| rs7605011 (A/G)                  | 2   | 121551822           | 1.36                            | 0.218                          | <i>GLI2</i> |
| rs3820723 (A/C)                  | 2   | 121552558           | 1.32                            | 0.258                          | <i>GLI2</i> |
| rs7569100 (G/A)                  | 2   | 121554317           | 0.92                            | 0.754                          | <i>GLI2</i> |
| rs36124185 (G/A)                 | 2   | 121558036           | 0.96                            | 0.763                          | <i>GLI2</i> |
| rs4848119 (A/G)                  | 2   | 121559113           | 1.06                            | 0.638                          | <i>GLI2</i> |
| rs4848632 (A/G)                  | 2   | 121562595           | 1.06                            | 0.649                          | <i>GLI2</i> |
| rs76201712 (A/G)                 | 2   | 121563734           | 1.13                            | 0.517                          | <i>GLI2</i> |
| rs55633297 (G/A)                 | 2   | 121565142           | 1.05                            | 0.845                          | <i>GLI2</i> |
| rs895485 (G/A)                   | 2   | 121570665           | 1.29                            | 0.058                          | <i>GLI2</i> |
| rs4848636 (A/G)                  | 2   | 121574575           | 0.61                            | 0.349                          | <i>GLI2</i> |
| rs2871627 (A/G)                  | 2   | 121578394           | 0.61                            | 0.354                          | <i>GLI2</i> |
| rs895491 (G/A)                   | 2   | 121578827           | 1.25                            | 0.093                          | <i>GLI2</i> |
| rs11122821 (G/A)                 | 2   | 121579810           | 0.74                            | 0.018                          | <i>GLI2</i> |
| rs11122822 (A/G)                 | 2   | 121579866           | 1.21                            | 0.139                          | <i>GLI2</i> |
| rs7561607 (A/G)                  | 2   | 121580431           | 1.23                            | 0.104                          | <i>GLI2</i> |
| rs116029714 (G/A)                | 2   | 121581093           | 1.24                            | 0.755                          | <i>GLI2</i> |
| rs2310896 (A/G)                  | 2   | 121581416           | 1.08                            | 0.698                          | <i>GLI2</i> |
| rs58292323 (G/A)                 | 2   | 121581586           | 0.65                            | 0.161                          | <i>GLI2</i> |
| rs4848640 (A/G)                  | 2   | 121585366           | 0.74                            | 0.451                          | <i>GLI2</i> |
| rs1992900 (A/G)                  | 2   | 121588532           | 1.32                            | 0.049                          | <i>GLI2</i> |
| rs895479 (G/A)                   | 2   | 121589440           | 1.15                            | 0.443                          | <i>GLI2</i> |
| rs13393992 (A/G)                 | 2   | 121591328           | 1.30                            | 0.144                          | <i>GLI2</i> |

|                   |   |           |      |       |      |
|-------------------|---|-----------|------|-------|------|
| rs11122826 (A/C)  | 2 | 121591950 | 1.20 | 0.474 | GLI2 |
| rs17005273 (A/G)  | 2 | 121592523 | 0.98 | 0.920 | GLI2 |
| rs11885290 (G/A)  | 2 | 121592733 | 0.98 | 0.876 | GLI2 |
| rs7559777 (A/C)   | 2 | 121595616 | 1.05 | 0.718 | GLI2 |
| rs74641446 (G/A)  | 2 | 121595667 | 0.98 | 0.943 | GLI2 |
| rs72971958 (G/A)  | 2 | 121598502 | 1.04 | 0.846 | GLI2 |
| rs7557372 (A/C)   | 2 | 121598768 | 0.91 | 0.575 | GLI2 |
| rs17005295 (G/A)  | 2 | 121600223 | 1.01 | 0.941 | GLI2 |
| rs4848641 (A/G)   | 2 | 121603584 | 0.97 | 0.830 | GLI2 |
| rs55917638 (A/G)  | 2 | 121606405 | 0.70 | 0.470 | GLI2 |
| rs67124142 (G/A)  | 2 | 121607893 | 1.04 | 0.743 | GLI2 |
| rs2166898 (A/G)   | 2 | 121612659 | 0.76 | 0.097 | GLI2 |
| rs55706422 (G/A)  | 2 | 121613509 | 1.03 | 0.807 | GLI2 |
| rs4848643 (A/G)   | 2 | 121618625 | 1.14 | 0.334 | GLI2 |
| rs4143116 (A/G)   | 2 | 121620828 | 1.03 | 0.839 | GLI2 |
| rs4848126 (A/G)   | 2 | 121627175 | 1.10 | 0.462 | GLI2 |
| rs277554 (G/A)    | 2 | 121631384 | 1.15 | 0.283 | GLI2 |
| rs277552 (A/G)    | 2 | 121632454 | 1.16 | 0.299 | GLI2 |
| rs55751863 (A/G)  | 2 | 121632865 | 1.02 | 0.928 | GLI2 |
| rs62150745 (A/G)  | 2 | 121633571 | 0.84 | 0.600 | GLI2 |
| rs277550 (A/G)    | 2 | 121634010 | 1.18 | 0.222 | GLI2 |
| rs72835595 (C/A)  | 2 | 121640679 | 1.24 | 0.625 | GLI2 |
| rs6541743 (A/G)   | 2 | 121647802 | 1.15 | 0.292 | GLI2 |
| rs12478509 (G/A)  | 2 | 121648806 | 0.88 | 0.527 | GLI2 |
| rs10199310 (A/G)  | 2 | 121649279 | 0.93 | 0.706 | GLI2 |
| rs79465951 (A/G)  | 2 | 121651189 | 1.19 | 0.409 | GLI2 |
| rs277536 (A/G)    | 2 | 121652747 | 1.06 | 0.647 | GLI2 |
| rs277539 (G/A)    | 2 | 121653647 | 1.05 | 0.703 | GLI2 |
| rs776189 (A/G)    | 2 | 121655419 | 1.54 | 0.096 | GLI2 |
| rs277541 (A/G)    | 2 | 121656429 | 1.23 | 0.530 | GLI2 |
| rs10173670 (C/A)  | 2 | 121657322 | 2.01 | 0.088 | GLI2 |
| rs11675340 (A/G)  | 2 | 121665196 | 0.97 | 0.833 | GLI2 |
| rs1187934 (A/G)   | 2 | 121667962 | 1.23 | 0.530 | GLI2 |
| rs1992902 (G/A)   | 2 | 121670602 | 1.04 | 0.862 | GLI2 |
| rs1992901 (A/G)   | 2 | 121670669 | 0.87 | 0.283 | GLI2 |
| rs277524 (A/G)    | 2 | 121670757 | 0.83 | 0.154 | GLI2 |
| rs10206938 (G/A)  | 2 | 121675238 | 1.03 | 0.934 | GLI2 |
| rs895549 (A/G)    | 2 | 121676484 | 1.17 | 0.582 | GLI2 |
| rs895547 (A/G)    | 2 | 121676655 | 1.18 | 0.573 | GLI2 |
| rs72955383 (A/G)  | 2 | 121681721 | 1.69 | 0.292 | GLI2 |
| rs114247324 (G/A) | 2 | 121682216 | 0.78 | 0.634 | GLI2 |
| rs6750250 (G/A)   | 2 | 121685681 | 0.93 | 0.835 | GLI2 |
| rs4848648 (G/A)   | 2 | 121686439 | 1.25 | 0.578 | GLI2 |

|                   |   |           |      |       |               |
|-------------------|---|-----------|------|-------|---------------|
| rs4848649 (A/G)   | 2 | 121686533 | 1.02 | 0.970 | <i>GLI2</i>   |
| rs6541745 (A/G)   | 2 | 121687129 | 1.18 | 0.564 | <i>GLI2</i>   |
| rs10167579 (A/G)  | 2 | 121699964 | 1.21 | 0.597 | <i>GLI2</i>   |
| rs12711535 (G/A)  | 2 | 121709536 | 1.25 | 0.461 | <i>GLI2</i>   |
| rs895545 (G/A)    | 2 | 121721467 | 1.21 | 0.543 | <i>GLI2</i>   |
| rs13396540 (C/A)  | 2 | 121726151 | 1.03 | 0.930 | <i>GLI2</i>   |
| rs280199 (A/G)    | 2 | 121733476 | 0.89 | 0.419 | <i>GLI2</i>   |
| rs3768696 (G/A)   | 2 | 121733538 | 0.91 | 0.495 | <i>GLI2</i>   |
| rs7588213 (C/A)   | 2 | 121735335 | 0.93 | 0.618 | <i>GLI2</i>   |
| rs280194 (G/A)    | 2 | 121738820 | 0.94 | 0.642 | <i>GLI2</i>   |
| rs7577521 (A/G)   | 2 | 121739875 | 0.95 | 0.703 | <i>GLI2</i>   |
| rs280198 (A/G)    | 2 | 121741762 | 0.92 | 0.537 | <i>GLI2</i>   |
| rs116677865 (G/A) | 2 | 121743169 | 1.16 | 0.777 | <i>GLI2</i>   |
| rs11564430 (A/G)  | 3 | 41239693  | 1.13 | 0.812 | <i>CTNNB1</i> |
| rs3915129 (C/A)   | 3 | 41243742  | 0.94 | 0.612 | <i>CTNNB1</i> |
| rs115813431 (C/A) | 3 | 41244376  | 0.62 | 0.249 | <i>CTNNB1</i> |
| rs12492719 (C/A)  | 3 | 41245731  | 1.06 | 0.851 | <i>CTNNB1</i> |
| rs73081753 (G/A)  | 3 | 41245804  | 1.02 | 0.964 | <i>CTNNB1</i> |
| rs13075993 (A/G)  | 3 | 41260017  | 0.93 | 0.562 | <i>CTNNB1</i> |
| rs11564445 (A/G)  | 3 | 41267752  | 0.76 | 0.393 | <i>CTNNB1</i> |
| rs11564447 (C/A)  | 3 | 41268354  | 0.95 | 0.892 | <i>CTNNB1</i> |
| rs4135385 (G/A)   | 3 | 41279440  | 0.94 | 0.696 | <i>CTNNB1</i> |
| rs2953 (C/A)      | 3 | 41281388  | 0.92 | 0.530 | <i>CTNNB1</i> |
| rs113152028 (G/A) | 3 | 41283882  | 1.01 | 0.982 | <i>CTNNB1</i> |
| rs9883073 (A/C)   | 3 | 41284536  | 0.93 | 0.571 | <i>CTNNB1</i> |
| rs79668667 (A/G)  | 3 | 41284947  | 1.02 | 0.975 | <i>CTNNB1</i> |
| rs11711946 (G/A)  | 3 | 41287018  | 0.91 | 0.456 | <i>CTNNB1</i> |
| rs6803275 (G/A)   | 3 | 41287455  | 1.06 | 0.851 | <i>CTNNB1</i> |
| rs9850653 (A/G)   | 3 | 41292736  | 0.99 | 0.977 | <i>CTNNB1</i> |
| rs11129896 (G/A)  | 3 | 41295767  | 1.01 | 0.909 | <i>CTNNB1</i> |
| rs9849022 (C/A)   | 3 | 41297523  | 0.99 | 0.935 | <i>CTNNB1</i> |
| rs73081797 (A/G)  | 3 | 41299516  | 1.02 | 0.892 | <i>CTNNB1</i> |
| rs2293300 (C/A)   | 3 | 41301534  | 0.99 | 0.967 | <i>CTNNB1</i> |
| rs10110283 (A/G)  | 8 | 128752178 | 0.75 | 0.434 | <i>MYC</i>    |
| rs28485160 (G/A)  | 9 | 98205645  | 0.80 | 0.332 | <i>PTCH1</i>  |
| rs16909865 (G/C)  | 9 | 98207302  | 0.78 | 0.284 | <i>PTCH1</i>  |
| rs2134721 (A/G)   | 9 | 98215306  | 0.94 | 0.692 | <i>PTCH1</i>  |
| rs28457693 (G/A)  | 9 | 98217348  | 0.98 | 0.917 | <i>PTCH1</i>  |
| rs2274693 (A/G)   | 9 | 98229297  | 0.96 | 0.811 | <i>PTCH1</i>  |
| rs16909898 (G/A)  | 9 | 98231008  | 0.90 | 0.612 | <i>PTCH1</i>  |
| rs2066836 (A/G)   | 9 | 98238358  | 0.98 | 0.882 | <i>PTCH1</i>  |
| rs2277183 (G/A)   | 9 | 98238860  | 1.54 | 0.419 | <i>PTCH1</i>  |
| rs574688 (G/C)    | 9 | 98239190  | 1.08 | 0.583 | <i>PTCH1</i>  |

|                  |    |          |      |       |                     |
|------------------|----|----------|------|-------|---------------------|
| rs2297086 (A/G)  | 9  | 98240120 | 1.00 | 0.981 | <i>PTCH1</i>        |
| rs2297087 (G/A)  | 9  | 98242925 | 0.94 | 0.700 | <i>PTCH1</i>        |
| rs17369383 (G/A) | 9  | 98245974 | 0.94 | 0.700 | <i>PTCH1</i>        |
| rs2282041 (G/A)  | 9  | 98248387 | 1.04 | 0.849 | <i>PTCH1</i>        |
| rs78400819 (A/G) | 9  | 98248780 | 0.49 | 0.113 | <i>PTCH1</i>        |
| rs77224875 (G/A) | 9  | 98254218 | 0.45 | 0.008 | <i>PTCH1</i>        |
| rs473902 (C/A)   | 9  | 98256235 | 0.87 | 0.511 | <i>PTCH1</i>        |
| rs473902 (C/A)   | 9  | 98256235 | 0.87 | 0.524 | <i>PTCH1</i>        |
| rs10512248 (C/A) | 9  | 98259703 | 1.04 | 0.800 | <i>PTCH1</i>        |
| rs60417486 (A/G) | 9  | 98262178 | 0.97 | 0.904 | <i>PTCH1</i>        |
| rs16909922 (G/A) | 9  | 98265901 | 0.97 | 0.904 | <i>PTCH1</i>        |
| rs34241213 (A/G) | 9  | 98272006 | 1.68 | 0.151 | <i>PTCH1</i>        |
| rs74499984 (C/A) | 9  | 98272491 | 1.42 | 0.465 | <i>PTCH1</i>        |
| rs3217795 (G/A)  | 12 | 4386064  | 1.12 | 0.660 | <i>CCND2</i>        |
| rs3217805 (G/C)  | 12 | 4388084  | 0.67 | 0.003 | <i>CCND2</i>        |
| rs4372527 (G/A)  | 12 | 4388914  | 1.38 | 0.024 | <i>CCND2</i>        |
| rs11063072 (G/A) | 12 | 4389158  | 0.87 | 0.625 | <i>CCND2</i>        |
| rs3217818 (G/A)  | 12 | 4390326  | 0.99 | 0.979 | <i>CCND2</i>        |
| rs3217830 (A/G)  | 12 | 4392530  | 1.29 | 0.072 | <i>CCND2</i>        |
| rs3217833 (A/G)  | 12 | 4393474  | 1.10 | 0.591 | <i>CCND2</i>        |
| rs3217840 (G/A)  | 12 | 4394877  | 1.29 | 0.067 | <i>CCND2</i>        |
| rs3217863 (A/G)  | 12 | 4399496  | 0.66 | 0.055 | <i>CCND2</i>        |
| rs3217867 (G/A)  | 12 | 4399917  | 0.91 | 0.529 | <i>CCND2</i>        |
| rs3217871 (C/A)  | 12 | 4400569  | 0.66 | 0.290 | <i>CCND2</i>        |
| rs3217874 (A/G)  | 12 | 4400808  | 1.05 | 0.723 | <i>CCND2</i>        |
| rs3217875 (G/A)  | 12 | 4401201  | 0.81 | 0.550 | <i>CCND2</i>        |
| rs3217882 (A/G)  | 12 | 4402817  | 0.97 | 0.840 | <i>CCND2</i>        |
| rs3217889 (A/G)  | 12 | 4403771  | 0.91 | 0.850 | <i>CCND2</i>        |
| rs3217898 (G/A)  | 12 | 4404376  | 1.23 | 0.132 | <i>CCND2</i>        |
| rs3217901 (G/A)  | 12 | 4405389  | 1.04 | 0.775 | <i>CCND2</i>        |
| rs3217905 (G/A)  | 12 | 4405686  | 0.93 | 0.590 | <i>CCND2</i>        |
| rs3217906 (G/A)  | 12 | 4405804  | 1.00 | 0.996 | <i>CCND2</i>        |
| rs10849028 (C/A) | 12 | 4405850  | 0.82 | 0.603 | <i>CCND2</i>        |
| rs12299509 (G/A) | 12 | 4406281  | 0.89 | 0.376 | <i>CCND2</i>        |
| rs3217907 (A/C)  | 12 | 4406836  | 0.78 | 0.055 | <i>CCND2</i>        |
| rs3217916 (G/A)  | 12 | 4408673  | 1.16 | 0.319 | <i>CCND2</i>        |
| rs3217925 (A/G)  | 12 | 4411639  | 1.07 | 0.659 | <i>CCND2</i>        |
| rs3217926 (G/A)  | 12 | 4411683  | 1.22 | 0.115 | <i>CCND2</i>        |
| rs1049612 (G/A)  | 12 | 4412762  | 1.23 | 0.107 | <i>CCND2</i>        |
| rs3217933 (G/A)  | 12 | 4413000  | 0.77 | 0.075 | <i>CCND2</i>        |
| rs7975791 (A/G)  | 12 | 49413486 | 1.02 | 0.953 | <i>MLL2 (KMT2D)</i> |
| rs10875912 (G/A) | 12 | 49416944 | 1.13 | 0.380 | <i>MLL2 (KMT2D)</i> |
| rs55776396 (C/A) | 12 | 49418435 | 1.15 | 0.688 | <i>MLL2 (KMT2D)</i> |

|                   |    |          |      |       |                     |
|-------------------|----|----------|------|-------|---------------------|
| rs117856947 (C/A) | 12 | 49422033 | 0.66 | 0.287 | <i>MLL2 (KMT2D)</i> |
| rs10875914 (G/A)  | 12 | 49422094 | 1.11 | 0.421 | <i>MLL2 (KMT2D)</i> |
| rs80132640 (G/A)  | 12 | 49426460 | 1.02 | 0.954 | <i>MLL2 (KMT2D)</i> |
| rs10875915 (A/G)  | 12 | 49430094 | 1.15 | 0.309 | <i>MLL2 (KMT2D)</i> |
| rs2304275 (G/A)   | 12 | 49442813 | 1.14 | 0.372 | <i>MLL2 (KMT2D)</i> |
| rs833836 (A/G)    | 12 | 49451459 | 0.96 | 0.794 | <i>MLL2 (KMT2D)</i> |
| rs118051719 (A/G) | 17 | 7566428  | 1.52 | 0.460 | <i>TP53</i>         |
| rs9893249 (G/A)   | 17 | 7570189  | 0.86 | 0.261 | <i>TP53</i>         |
| rs9914052 (G/C)   | 17 | 7570823  | 0.81 | 0.546 | <i>TP53</i>         |
| rs17881556 (G/A)  | 17 | 7570869  | 0.97 | 0.926 | <i>TP53</i>         |
| rs858528 (A/G)    | 17 | 7574936  | 1.37 | 0.112 | <i>TP53</i>         |
| rs1625895 (A/G)   | 17 | 7578115  | 1.29 | 0.204 | <i>TP53</i>         |
| rs2909430 (G/A)   | 17 | 7578645  | 1.34 | 0.135 | <i>TP53</i>         |
| rs11652704 (G/A)  | 17 | 7584400  | 0.87 | 0.536 | <i>TP53</i>         |
| rs17881035 (G/A)  | 17 | 7587899  | 0.73 | 0.262 | <i>TP53</i>         |
| rs11879293 (A/G)  | 19 | 11072610 | 1.00 | 0.995 | <i>SMARCA4</i>      |
| rs2163800 (G/A)   | 19 | 11075706 | 1.04 | 0.786 | <i>SMARCA4</i>      |
| rs73011369 (A/G)  | 19 | 11077662 | 1.08 | 0.773 | <i>SMARCA4</i>      |
| rs12610374 (A/G)  | 19 | 11080921 | 0.94 | 0.681 | <i>SMARCA4</i>      |
| rs4804553 (G/A)   | 19 | 11081405 | 0.94 | 0.681 | <i>SMARCA4</i>      |
| rs4804554 (A/C)   | 19 | 11083210 | 0.98 | 0.910 | <i>SMARCA4</i>      |
| rs17001070 (G/A)  | 19 | 11086746 | 1.08 | 0.826 | <i>SMARCA4</i>      |
| rs12459603 (A/G)  | 19 | 11089846 | 1.36 | 0.371 | <i>SMARCA4</i>      |
| rs11672595 (A/G)  | 19 | 11094494 | 0.72 | 0.382 | <i>SMARCA4</i>      |
| rs76614166 (G/A)  | 19 | 11104243 | 0.59 | 0.251 | <i>SMARCA4</i>      |
| rs17001075 (G/A)  | 19 | 11105593 | 1.13 | 0.713 | <i>SMARCA4</i>      |
| rs7935 (G/A)      | 19 | 11105608 | 0.98 | 0.891 | <i>SMARCA4</i>      |
| rs57900086 (G/A)  | 19 | 11109468 | 0.97 | 0.921 | <i>SMARCA4</i>      |
| rs17001076 (A/G)  | 19 | 11113520 | 0.98 | 0.933 | <i>SMARCA4</i>      |
| rs17001078 (G/A)  | 19 | 11113651 | 1.00 | 0.985 | <i>SMARCA4</i>      |
| rs12983316 (G/A)  | 19 | 11114352 | 1.05 | 0.778 | <i>SMARCA4</i>      |
| rs13345127 (A/G)  | 19 | 11116266 | 0.95 | 0.788 | <i>SMARCA4</i>      |
| rs73013166 (G/A)  | 19 | 11126160 | 1.06 | 0.840 | <i>SMARCA4</i>      |
| rs73013169 (A/C)  | 19 | 11127069 | 0.98 | 0.901 | <i>SMARCA4</i>      |
| rs17001095 (G/A)  | 19 | 11133272 | 1.00 | 0.995 | <i>SMARCA4</i>      |
| rs56167249 (G/A)  | 19 | 11157423 | 1.05 | 0.808 | <i>SMARCA4</i>      |
| rs77287598 (A/G)  | 19 | 11159449 | 0.69 | 0.234 | <i>SMARCA4</i>      |
| rs6511719 (G/A)   | 19 | 11164790 | 1.06 | 0.838 | <i>SMARCA4</i>      |
| rs3786724 (G/A)   | 19 | 11166791 | 1.00 | 0.998 | <i>SMARCA4</i>      |
| rs3786725 (A/G)   | 19 | 11166827 | 1.00 | 0.991 | <i>SMARCA4</i>      |
| rs7258189 (G/A)   | 19 | 11169947 | 0.94 | 0.646 | <i>SMARCA4</i>      |
| rs8099996 (G/A)   | 19 | 11174625 | 0.94 | 0.653 | <i>SMARCA4</i>      |
| rs73013198 (A/G)  | 19 | 11174742 | 1.01 | 0.954 | <i>SMARCA4</i>      |

|                  |   |          |      |       |              |
|------------------|---|----------|------|-------|--------------|
| rs4358953 (A/G)  | X | 41196417 | 0.88 | 0.374 | <i>DDX3X</i> |
| rs11542970 (G/A) | X | 41197200 | 1.00 | 0.997 | <i>DDX3X</i> |
| rs953114 (C/A)   | X | 41197542 | 0.87 | 0.339 | <i>DDX3X</i> |
| rs2275943 (G/A)  | X | 41198456 | 0.94 | 0.753 | <i>DDX3X</i> |
| rs6610545 (G/A)  | X | 41198715 | 0.88 | 0.379 | <i>DDX3X</i> |
| rs12851342 (C/A) | X | 41199626 | 1.02 | 0.936 | <i>DDX3X</i> |
| rs4827268 (A/G)  | X | 41199812 | 0.66 | 0.204 | <i>DDX3X</i> |
| rs10521420 (A/G) | X | 41202159 | 0.65 | 0.198 | <i>DDX3X</i> |
| rs72626410 (A/G) | X | 41210256 | 0.66 | 0.204 | <i>DDX3X</i> |
| rs7877664 (A/G)  | X | 41210942 | 1.02 | 0.910 | <i>DDX3X</i> |

<sup>a</sup> Fixed-effect model meta-analysis combining the results from the Swedish and the Danish datasets



**Supplementary Table 3.** OR and p-values for eight genetic variants (in *GLI2*, *PTCH1* and *CCND2*), calculated in the Swedish and Danish datasets separately.

| <b>SNP<br/>(minor/major(ref)<br/>allele)</b> | <b>Gene</b>  | <b>OR<sub>Sv</sub><sup>a</sup> (95% CI)</b> | <b>P<sub>Sv</sub><sup>a</sup></b> | <b>OR<sub>Dk</sub><sup>b</sup> (95% CI)</b> | <b>P<sub>Dk</sub><sup>b</sup></b> |
|----------------------------------------------|--------------|---------------------------------------------|-----------------------------------|---------------------------------------------|-----------------------------------|
| rs13008945 (G/A)                             | <i>GLI2</i>  | 0.57 (0.35-0.93)                            | 0.024                             | 0.83 (0.53-1.30)                            | 0.411                             |
| rs2121992 (A/G)                              | <i>GLI2</i>  | 0.51 (0.31-0.83)                            | 0.007                             | 0.94 (0.61-1.45)                            | 0.778                             |
| rs4848628 (C/A)                              | <i>GLI2</i>  | 0.48 (0.27-0.84)                            | 0.011                             | 0.87 (0.55-1.40)                            | 0.577                             |
| rs11122821 (G/A)                             | <i>GLI2</i>  | 0.68 (0.48-0.97)                            | 0.032                             | 0.80 (0.56-1.15)                            | 0.232                             |
| rs1992900 (A/G)                              | <i>GLI2</i>  | 1.39 (0.93-2.07)                            | 0.104                             | 1.26 (0.85-1.86)                            | 0.247                             |
| rs77224875 (G/A)                             | <i>PTCH1</i> | 0.37 (0.16-0.87)                            | 0.023                             | 0.54 (0.25-1.19)                            | 0.128                             |
| rs3217805 (G/C)                              | <i>CCND2</i> | 0.69 (0.47-1.01)                            | 0.058                             | 0.65 (0.45-0.93)                            | 0.018                             |
| rs4372527 (G/A)                              | <i>CCND2</i> | 1.17 (0.80-1.73)                            | 0.421                             | 1.64 (1.10-2.45)                            | 0.016                             |

<sup>a</sup> OR, 95% CI, and p-value calculated using unconditional logistic regression in the Swedish dataset.

<sup>b</sup> OR, 95% CI, and p-value calculated using unconditional logistic regression in the Danish dataset.

### Supplementary References

1. Northcott PA, Nakahara Y, Wu X, et al (2009) Multiple recurrent genetic events converge on control of histone lysine methylation in medulloblastoma. *Nat Genet* 41: 465-472. doi:10.1038/ng.336
2. Northcott PA, Shih DJ, Peacock J, et al (2012) Subgroup-specific structural variation across 1,000 medulloblastoma genomes. *Nature* 488: 49-56. doi:10.1038/nature11327
3. Robinson G, Parker M, Kranenburg TA, et al (2012) Novel mutations target distinct subgroups of medulloblastoma. *Nature* 488: 43-48. doi:10.1038/nature11213
4. Parsons DW, Li M, Zhang X, et al (2011) The genetic landscape of the childhood cancer medulloblastoma. *Science* 331: 435-439. doi:10.1126/science.1198056
5. Pugh TJ, Weeraratne SD, Archer TC, et al (2012) Medulloblastoma exome sequencing uncovers subtype-specific somatic mutations. *Nature* 488: 106-110. doi:10.1038/nature11329
6. Jones DT, Jager N, Kool M, et al (2012) Dissecting the genomic complexity underlying medulloblastoma. *Nature* 488: 100-105. doi:10.1038/nature11284
